# Supplementary material for: What Is Resistance? Impact of Phenotypic versus Molecular Drug Resistance Testing on Therapy for Multi- and Extensively Drug-Resistant Tuberculosis
Source: PubMed Central journal article supplement (PMC5786814; doi:10.1128/aac.01550-17), 2018-01-25
Supplement: AAC.01550-17_zac002186843s1.pdf [file AAC.01550-17_zac002186843s1.pdf]

## SUPPLEMENTARY METHODS

### Treatment algorithm based on Horsburgh et al.<sup>1</sup>

- Use a stepwise approach to design a MDR-TB regimen.
- The regimen should include a combination of  $\geq 4$  drugs in MDR-TB (a combination of  $\geq 5$  drugs in XDR-TB) likely to be active against *M. tuberculosis*.
- Recommended total duration of the treatment is currently 20 months.

#### Step 1

In case of rifabutin susceptibility (and rifampicin resistance) use rifabutin in the drug regimen. Due to lack of data, it cannot be recommended at present to count rifabutin among the  $\geq 4$  active drugs in the MDR-TB regimen ( $\geq 5$  drugs in XDR-TB).

#### Comments

- Rifabutin should be part of a MDR-TB therapy if *M. tuberculosis* is in vitro susceptible despite rifampicin resistance (usually related to a D516mut mutation in the *rpoB* gene). Monitor for hepatotoxicity.
- Dose adjustments may be necessary when dosing with interacting drugs (e.g. ART).
- Due to lack of data it is currently not recommended to count this drug among the number of drugs used for the treatment of MDR-TB or shorten the duration of therapy.

#### Step 2

In case of a low-level isoniazid drug resistance use high dose isoniazid in the drug regimen.

#### Comments

- In the absence of a *katG* S315T mutation, *inhA* promoter mutations (8A/C, 15T, 16G) confer low-level isoniazid resistance (MIC < 1  $\mu\text{g/ml}$ ) and treatment with isoniazid 16-20 mg/kg should be considered.
- Monitor for hepatotoxicity.

- Give with pyridoxine.
- Due to lack of data, it cannot be recommended at present to count high dose isoniazid among the  $\geq 4$  active drugs in the MDR-TB regimen ( $\geq 5$  drugs in XDR-TB) or shorten the duration of therapy.
- With *inhA* promotor mutation ethionamide or prothionamide should not be included in the regimen, as *inhA* promotor mutations usually lead to thioamide drug resistance.

### Step 3

Unless drug resistance to a later generation fluoroquinolone is suggested by genotypic or phenotypic drug susceptibility testing use moxifloxacin or levofloxacin in the drug regimen.

#### Comments

- Fluoroquinolones are probably the most effective 2nd line antituberculosis drugs available at present.
- QTc interval prolongation may be potentiated with other drugs. Close monitoring recommended when used with other drugs that prolong the QTc interval. Concurrent use of moxifloxacin with bedaquiline or delamanid not recommended.

### Step 4

In case of later generation fluoroquinolone drug resistance, use bedaquiline in the drug regimen.

#### Comments

Bedaquiline is approved for the treatment of MDR-TB by the FDA and EMA for use as part of an appropriate combination regimen when an effective treatment regimen is unavailable because of resistance or intolerability to other medications. QTc interval prolongation may be potentiated with other drugs. Close monitoring recommended when used with other drugs that prolong the QTc interval. Concurrent use with delamanid or moxifloxacin not recommended.

### Step 5

Unless drug resistance to a second line injectable drug (SLID, amikacin, capreomycin or kanamycin) is suggested by genotypic or phenotypic drug susceptibility testing use a SLID as part of the drug regimen.

#### Comments

If possible, a SLID should be included during the first 8 months of the treatment.

Capreomycin is preferred for reasons of drug-toxicity in long-term treatment. Patients should have a CVC catheter with subcutaneous reservoir implanted for daily intravenous therapy. Monitor renal function, electrolytes and audiology exam.

### Step 6

Unless drug resistance to ethionamide/prothionamide, cycloserine/terizidone, PAS or linezolid is suggested by genotypic or phenotypic drug susceptibility testing, a combination of up to 3 of these drugs is often used.

#### Comments

- Prothionamide or ethionamide are often not tolerated in combination with PAS. Monitor liver and thyroid function. Give with pyridoxine.
- Terizidone is less toxic than cycloserine and is the fusion product of two molecules of cycloserine and one molecule of terephthalaldehyde. Monitor mental status. Give with pyridoxine.
- PAS is often not tolerated in combination with prothionamide or ethionamide.
- Severe adverse events are frequent in long-term therapy with linezolid, close monitoring of blood count and awareness of peripheral neuropathy is mandatory

### Step 7

If a sufficient number of likely active drugs cannot be achieved in the regimen, add meropenem/amoxicillin-clavulanate and/or clofazimine and/or delamanid

## Comments

- For the treatment of XDR-TB with meropenem/amoxicillin-clavulanate long term intravenous access recommended.
- When treatment with clofazimine causes severe skin discoloration dose reduction to five times a week may be justified. Monitor QTc interval.
- Delamanid is approved for the treatment of MDR-TB by the EMA for use as part of an appropriate combination regimen when an effective treatment regimen is unavailable because of resistance or intolerability to other medications. QTc interval prolongation may be potentiated with other drugs. Close monitoring recommended when used with other drugs that prolong the QTc interval. Concurrent use with bedaquiline or moxifloxacin not recommended.

## Step 8

Pyrazinamide and/or ethambutol should be added to the initial treatment regimen, but the drugs should not be counted among the  $\geq 4$  active drugs in the MDR-TB regimen ( $\geq 5$  drugs in XDR-TB regimen). Treatment with pyrazinamide and/or ethambutol should be discontinued, if results from phenotypic or genotypic drug susceptibility testing suggest resistance to either drug.

## Comments

Phenotypic drug resistance to pyrazinamide and ethambutol is very common in M/XDR-TB. There are no data available to support the use of either drug when drug resistance has been documented. Due to the high pill burden of a M/XDR-TB regimen, the authors do not recommend the use of either drug in a M/XDR-TB regimen if drug resistance has been documented by a quality controlled laboratory.

## **MIC testing in Sweden**

MICs for consecutive clinical isolates from the Karolinska University Hospital in Sweden as well as *M. tuberculosis* H37Rv ATCC 27294 were determined using the MGIT at Malmö University Hospital as previously described.<sup>2</sup> The following antibiotics and concentration ranges in  $\mu\text{g/ml}$  were tested

using two-fold dilutions, including the CC were applicable: isoniazid (0.016-0.25+0.1), rifampicin (0.016-1), ethambutol (1-4+5), pyrazinamide (8-128+100), amikacin (0.125-2), capreomycin (0.25-4), and levofloxacin (0.064-2). A small number of non-consecutive, resistant isolates were included as well, for which MIC testing was done with a two-fold concentration series above the CC.

## SUPPLEMENTARY RESULTS

### Cycloserine

Loss-of-function mutations in alanine dehydrogenase (Ald) have been shown to result in elevated MICs, which should apply to the XDR isolate 13739-13 as a result of a premature stop at codon 271 out of the total 371 codons.<sup>3</sup> Another XDR isolate (811-15) had an *ald* mutation at codon 198, which directly interacts with its coenzyme nicotinamide adenine dinucleotide (NAD).<sup>4</sup> Moreover, codon 238, which was mutated in a third isolate, is within 4 Å of the NAD binding region.<sup>4</sup>

### PAS

For the isolates, for which PAS was tested, all 13 isolates that lacked mutations in any of the known PAS resistance genes tested susceptible at 4 µg/ml. Only five of the seven isolates with known resistance mutation in either the dihydrofolate synthase *FolC*, which is required for the activation of the PAS, or with promoter-up mutations in *Rv2671*, an alternative dihydrofolate reductase and one of the targets of PAS, tested resistant.<sup>5-7</sup> The susceptible result for 13255-14 (C-12T *Rv2671*) and 13739-13 (*folC* S150G) likely represented a false-susceptible result.<sup>6-9</sup> The remaining four isolates harboured two different amino acid changes at the same codon (P253A or P253L) of the thymidylate synthase *ThyA*, which is typically a signal for positive selection, yet all tested susceptible (repeatedly, in case of the former mutation).<sup>10</sup> This was surprising given that the latter mutation coincided with a promoter mutation in the second thymidylate synthase *ThyX*, which is believed to compensate for loss-of-function mutations in *thyA*, which, in turn, confer resistance by reducing the catalytic demand of the dihydrofolate reductase *DfrA*, the main target of PAS.<sup>5,11</sup>

**Table S1**

Details of 25 patients in this study.

| <b>Patient characteristic</b>          | <b>N (%) or median (IQR)</b> |
|----------------------------------------|------------------------------|
| Age at admission                       | 39 years (27.8-45.8 years)   |
| MDR                                    | 20 (80)                      |
| XDR                                    | 5 (20)                       |
| Male gender                            | 15 (62.5)                    |
| Non-German origin                      | 22 (91.7)                    |
| Smear positive at diagnosis            | 13 (54.2)                    |
| Smear grade 3 or 4                     | 6 (46.1)                     |
| Median pre-admission treatment time    | 19.5 days (10.8-82.5 days)   |
| Time to culture positivity at baseline | 17 days (8-28 days)          |
| Time to culture positivity at week 1   | 22 days (12-40 days)         |

**Table S2 (provided as separate file)****Table S3**

Comparison of standard-algorithm derived regimens based on molecular DST with pDST.

| <b>Molecular DST assays</b>               | <b>Mean overlap with pDST-derived regimen (95% CI)</b> |
|-------------------------------------------|--------------------------------------------------------|
| WGS                                       | 93% (88-98%)                                           |
| LPAs without ethambutol and pyrazinamide  | 87% (80-94%)                                           |
| LPAs                                      | 63% (56-70%)                                           |
| Xpert without ethambutol and pyrazinamide | 68% (56-80%)                                           |
| Xpert                                     | 49% (39-59%)                                           |

**Table S4**

Overview of the number of drugs administered in regimens based on molecular DST to which pDST showed resistance.

| Molecular DST-derived regimen             | Drugs used with pDST confirmed resistance [n] |
|-------------------------------------------|-----------------------------------------------|
| WGS                                       | 0                                             |
| LPAs without ethambutol and pyrazinamide  | 11                                            |
| LPAs                                      | 56                                            |
| Xpert without ethambutol and pyrazinamide | 31                                            |
| Xpert                                     | 77                                            |



**Table S5**

Number of antibiotics prescribed as part of the regimens based on either pDST, WGS, LPAs, or Xpert, stratified by the group of anti-TB drug, as defined in the WHO treatment guidelines.<sup>12</sup>

|                         | Group A | Group B | A+B     | Group C | Group D1 | Group D2 | Group D3 | Total D | Total   |
|-------------------------|---------|---------|---------|---------|----------|----------|----------|---------|---------|
| pDST                    | 18      | 19      | 37      | 49      | 8        | 7        | 9        | 24      | 110     |
| WGS                     | 16      | 19      | 35      | 47      | 4        | 10       | 10       | 24      | 106     |
| LPAs                    | 18      | 19      | 37      | 51      | 50       | 7        | 8        | 65      | 152     |
| Xpert                   | 25      | 25      | 50      | 50      | 50       | 0        | 0        | 50      | 150     |
| p-values pDST vs. Xpert | <0.001* | <0.001* | <0.001* | 0.84    | <0.001*  | <0.001*  | <0.001*  | <0.001* | <0.001* |
| p-values pDST vs. LPAs  | 1       | 1       | 1       | 0.69    | <0.001*  | 1        | 0.668    | <0.001* | <0.001* |
| p-values pDST vs. WGS   | 0.4047  | 1       | 0.54    | 0.69    | 0.0371*  | 0.1573   | 0.683    | 1       | 0.62    |

\* $P < 0.05$  considered as significant using STATA (Differences of proportion).

**Table S6**33 resistance genes analysed using WGS.<sup>13</sup>

| <i>H37Rv gene</i>     | <b>Genomic start</b> | <b>Genomic stop</b> | <b>Rv number</b> | <b>associated antibiotic resistance</b>        |
|-----------------------|----------------------|---------------------|------------------|------------------------------------------------|
| <i>gyrB upstream</i>  | 4998                 | 5239                |                  | moxifloxacin, ofloxacin, levofloxacin          |
| <i>gyrB</i>           | 5240                 | 7267                | Rv0005           | moxifloxacin, ofloxacin, levofloxacin          |
| <i>gyrA upstream</i>  | 7268                 | 7301                |                  | moxifloxacin, ofloxacin, levofloxacin          |
| <i>gyrA</i>           | 7302                 | 9818                | Rv0006           | moxifloxacin, ofloxacin, levofloxacin          |
| <i>mshA upstream</i>  | 575301               | 575347              |                  | isoniazid, ethionamide, prothionamide          |
| <i>mshA</i>           | 575348               | 576790              | Rv0486           | isoniazid, ethionamide, prothionamide          |
| <i>rpoB upstream</i>  | 759310               | 759806              |                  | rifampicin, rifabutin                          |
| <i>rpoB</i>           | 759807               | 763325              | Rv0667           | rifampicin, rifabutin                          |
| <i>rpsL upstream</i>  | 781312               | 781559              |                  | streptomycin                                   |
| <i>rpsL</i>           | 781560               | 781934              | Rv0682           | streptomycin                                   |
| <i>rplC upstream</i>  | 800793               | 800808              |                  | linezolid                                      |
| <i>rplC</i>           | 800809               | 801462              | Rv0701           | linezolid                                      |
| <i>tap</i>            | 1406081              | 1407340             | Rv1258c          | streptomycin, PAS                              |
| <i>tap upstream</i>   | 1407341              | 1408238             | Rv1259           | streptomycin, PAS                              |
| <i>rrs upstream</i>   | 1471743              | 1471845             |                  | streptomycin, amikacin, kanamycin, capreomycin |
| <i>rrs</i>            | 1471846              | 1473382             | Rvnr01           | streptomycin, amikacin, kanamycin, capreomycin |
| <i>rrl upstream</i>   | 1473383              | 1473657             |                  | linezolid, capreomycin, clarithromycin         |
| <i>rrl</i>            | 1473658              | 1476795             | Rvnr02           | linezolid, capreomycin, clarithromycin         |
| <i>fabG1 upstream</i> | 1673300              | 1673439             |                  | isoniazid, ethionamide, prothionamide          |
| <i>fabG1</i>          | 1673440              | 1674183             | Rv1483           | isoniazid, ethionamide, prothionamide          |
| <i>inhA upstream</i>  | 1674184              | 1674201             |                  | isoniazid, ethionamide, prothionamide          |
| <i>inhA</i>           | 1674202              | 1675011             | Rv1484           | isoniazid, ethionamide, prothionamide          |
| <i>tlyA</i>           | 1917940              | 1918746             | Rv1694           | capreomycin                                    |
| <i>cycA</i>           | 1929786              | 1931456             | Rv1704c          | cycloserine                                    |
| <i>cycA upstream</i>  | 1931457              | 1932654             |                  | cycloserine                                    |
| <i>katG</i>           | 2153889              | 2156111             | Rv1908c          | isoniazid                                      |
| <i>katG upstream</i>  | 2156112              | 2156148             |                  | isoniazid                                      |
| <i>furA</i>           | 2156149              | 2156592             | Rv1909c          | isoniazid                                      |
| <i>furA upstream</i>  | 2156593              | 2156705             |                  | isoniazid                                      |
| <i>pncA</i>           | 2288681              | 2289241             | Rv2043c          | pyrazinamide                                   |
| <i>pncA upstream</i>  | 2289242              | 2289281             |                  | pyrazinamide                                   |

|                        |         |         |               |                                                 |
|------------------------|---------|---------|---------------|-------------------------------------------------|
| <i>eis</i>             | 2714124 | 2715332 | Rv2416c       | kanamycin                                       |
| <i>eis upstream</i>    | 2715333 | 2715471 |               | kanamycin                                       |
| <i>folC</i>            | 2746135 | 2747598 | Rv2447c       | PAS                                             |
| <i>Rv2671 upstream</i> | 2985731 | 2986838 | Rv2670c       | PAS                                             |
| <i>Rv2671</i>          | 2986839 | 2987615 | Rv2671        | PAS                                             |
| <i>dfrA</i>            | 3073130 | 3073609 | Rv2763c       | PAS, co-trimoxazole                             |
| <i>dfrA upstream</i>   | 3073610 | 3073679 |               | PAS, co-trimoxazole                             |
| <i>thyA</i>            | 3073680 | 3074471 | Rv2764c       | PAS                                             |
| <i>thyA upstream</i>   | 3074472 | 3074635 |               | PAS                                             |
| <i>ald upstream</i>    | 3086755 | 3086819 |               | cycloserine                                     |
| <i>ald</i>             | 3086820 | 3087935 | Rv2780        | cycloserine                                     |
| <i>whiB7</i>           | 3568401 | 3568679 | Rv3197A       | streptomycin, kanamycin,<br>clarithromycin, PAS |
| <i>whiB7 upstream</i>  | 3568680 | 3569108 |               | streptomycin, kanamycin,<br>clarithromycin, PAS |
| <i>alr</i>             | 3840194 | 3841420 | Rv3423c       | cycloserine                                     |
| <i>alr upstream</i>    | 3841421 | 3841713 |               | cycloserine                                     |
| <i>aftA,embC</i>       | 4237932 | 4243147 | Rv3792,Rv3793 | ethambutol                                      |
| <i>embA upstream</i>   | 4243148 | 4243232 |               | ethambutol                                      |
| <i>embA,embB</i>       | 4243233 | 4249810 | Rv3794,Rv3795 | ethambutol                                      |
| <i>ubiA</i>            | 4268925 | 4269833 | Rv3806c       | ethambutol                                      |
| <i>ubiA upstream</i>   | 4269834 | 4269839 |               | ethambutol                                      |
| <i>ethA</i>            | 4326004 | 4327473 | Rv3854c       | ethionamide, prothionamide,<br>thioacetazone    |
| <i>ethA upstream</i>   | 4327474 | 4327548 |               | ethionamide, prothionamide,<br>thioacetazone    |
| <i>gidB</i>            | 4407528 | 4408202 | Rv3919c       | streptomycin                                    |
| <i>gidB upstream</i>   | 4408203 | 4408333 |               | streptomycin                                    |

**Table S7**

Mutations in resistance genes that were considered not to confer resistance.

| <b>Genome Pos (H37Rv)</b> | <b>polymorphism</b> | <b>Gene</b> | <b>phylogenetic marker for</b> |
|---------------------------|---------------------|-------------|--------------------------------|
| 7362                      | E21Q (gag/Cag)      | Rv0006      | non H37Rv_lab_strain           |
| 7585                      | S95T (agc/aCc)      | Rv0006      | non H37Rv_like                 |
| 8040                      | G247S (ggc/Agc)     | Rv0006      | LAM subgroup                   |
| 9304                      | G668D (ggc/gAc)     | Rv0006      | non H37Rv_like                 |
| 157292                    | E103E (gag/gaa)     | Rv0129c     | LAM                            |
| 403364                    | P826P (ccc/cct)     | Rv0338c     | LAM subgroup                   |
| 491742                    | F320F (ttt/ttC)     | Rv0407      | non Euro-American (lineage 4)  |
| 497491                    | D270D (gac/gat)     | Rv0411c     | Beijing                        |
| 575907                    | A187V (gca/gTa)     | Rv0486      | Beijing subgroup               |
| 648856                    | G107G (ggt/ggc)     | Rv0557      | non Euro-American (lineage 4)  |
| 763031                    | A1075A (gct/gcC)    | Rv0667      | non Euro-American (lineage 4)  |

|         |                     |               |                               |
|---------|---------------------|---------------|-------------------------------|
| 764995  | A542A (gcc/gcG)     | Rv0668        | LAM                           |
| 766645  | E1092D (gaa/gaC)    | Rv0668        | Beijing subgroup              |
| 775639  | I948V (att/Gtt)     | Rv0676c       | non H37Rv_lab_strain          |
| 776100  | T794I (acc/aTc)     | Rv0676c       | non Euro-American (lineage 4) |
| 776182  | D767N (gac/Aac)     | Rv0676c       | Beijing subgroup              |
| 781395  | 781395 t/c          | rpsL upstream | non H37Rv_lab_strain          |
| 797736  | L268L (ctc/ctt)     | Rv0697        | Beijing subgroup              |
| 931123  | Y57Y (tat/tac)      | Rv0835        | non Euro-American (lineage 4) |
| 1474001 | 344 c/t             | Rvnr02        | H37Rv_like subgroup           |
| 1762615 | A291V (gcc/gTc) (0) | Rv1557        | LAM subgroup                  |
| 1834177 | R212R (cga/cgC)     | Rv1630        | Beijing                       |
| 1917972 | L11L (cta/ctG)      | Rv1694        | non H37Rv_lab_strain          |
| 1931179 | R93L (cgg/cTg)      | Rv1704c       | non H37Rv_lab_strain          |
| 2053682 | I80I (atc/att)      | Rv1811        | LAM                           |
| 2154724 | R463L (cgg/cTg)     | Rv1908c       | non Euro-American (lineage 4) |
| 2505085 | A205A (gcc/gct)     | Rv2231c       | Beijing subgroup              |
| 2518919 | G269S (ggt/Agt)     | Rv2245        | LAM subgroup                  |
| 2714846 | V163I (gtc/Atc)     | Rv2416c       | Beijing subgroup              |
| 2752122 | T20R (acg/agg)      | Rv2450c       | Beijing                       |
| 2955957 | Asp64Ala (gat/gct)  | Rv2629        | Beijing                       |
| 3073868 | T202A (acc/Gcc)     | Rv2764c       | LAM                           |
| 3326554 | N152H (aac/cac)     | Rv2971        | non Euro-American (lineage 4) |
| 3336825 | T365A (aca/Gca)     | Rv2981c       | non H37Rv_like                |
| 3566107 | A107D (gcc/gAc)     | Rv3196        | Beijing subgroup              |
| 3836739 | D51D (gac/gat)      | Rv3417c       | H37Rv_like subgroup           |
| 4238675 | G248G (ggc/ggT)     | Rv3792        | Beijing subgroup              |
| 4242643 | R927R (cgc/cgT)     | Rv3793        | non H37Rv_lab_strain          |
| 4243346 | Q38Q (caa/caG)      | Rv3794        | Beijing subgroup              |
| 4243460 | C76C (tgc/tgT)      | Rv3794        | Beijing                       |
| 4248115 | D534D (gac/gaT)     | Rv3795        | Beijing subgroup              |
| 4407588 | A205A (gca/gcG)     | Rv3919c       | non Euro-American (lineage 4) |
| 4407927 | E92D (gaa/gaC)      | Rv3919c       | Beijing                       |
| 4408156 | L16R (ctt/cGt)      | Rv3919c       | LAM                           |

**Table S8 (provided as separate file)**

## References

1. Horsburgh CR, Jr., Barry CE, 3rd, Lange C. Treatment of tuberculosis. *N Engl J Med* 2015; **373**: 2149-60.
2. Sturegård E, Ängeby KA, Werngren J et al. Little difference between minimum inhibitory concentrations of *Mycobacterium tuberculosis* wild-type organisms determined with BACTEC MGIT 960 and Middlebrook 7H10. *Clin Microbiol Infect* 2015; **21**: 148 e5-7.
3. Desjardins CA, Cohen KA, Munsamy V et al. Genomic and functional analyses of *Mycobacterium tuberculosis* strains implicate *ald* in D-cycloserine resistance. *Nat Genet* 2016; **48**: 544-51.
4. Tripathi SM, Ramachandran R. Crystal structures of the *Mycobacterium tuberculosis* secretory antigen alanine dehydrogenase (Rv2780) in apo and ternary complex forms captures "open" and "closed" enzyme conformations. *Proteins* 2008; **72**: 1089-95.
5. Moradigaravand D, Grandjean L, Martinez E et al. *dfrA thyA* double deletion in *para*-aminosalicylic acid-resistant *Mycobacterium tuberculosis* Beijing strains. *Antimicrob Agents Chemother* 2016; **60**: 3864-7.
6. Zheng J, Rubin EJ, Bifani P et al. *Para*-aminosalicylic acid is a prodrug targeting dihydrofolate reductase in *Mycobacterium tuberculosis*. *J Biol Chem* 2013; **288**: 23447-56.
7. Zhao F, Wang XD, Erber LN et al. Binding pocket alterations in dihydrofolate synthase confer resistance to *para*-aminosalicylic acid in clinical isolates of *Mycobacterium tuberculosis*. *Antimicrob Agents Chemother* 2014; **58**: 1479-87.
8. Zhang X, Liu L, Zhang Y et al. Genetic determinants involved in *p*-aminosalicylic acid resistance in clinical isolates from tuberculosis patients in northern China from 2006 to 2012. *Antimicrob Agents Chemother* 2015; **59**: 1320-4.
9. Cheng VW, Leung KS, Kwok JS et al. Phylogenetic and structural significance of dihydrofolate synthase (*folC*) mutations in drug-resistant *Mycobacterium tuberculosis*. *Microb Drug Resist* 2016.
10. Farhat MR, Shapiro BJ, Kieser KJ et al. Genomic analysis identifies targets of convergent positive selection in drug-resistant *Mycobacterium tuberculosis*. *Nat Genet* 2013; **45**: 1183-9.
11. Merker M, Kohl TA, Roetzer A et al. Whole genome sequencing reveals complex evolution patterns of multidrug-resistant *Mycobacterium tuberculosis* Beijing strains in patients. *PLoS One* 2013; **8**: e82551.
12. World Health Organization. WHO treatment guidelines for drug-resistant tuberculosis. 2016 update. <http://www.who.int/tb/MDRTBguidelines2016.pdf> (accessed 3.8.2016).
13. Köser CU, Bryant JM, Becq J et al. Whole-genome sequencing for rapid susceptibility testing of *M. tuberculosis*. *N Engl J Med* 2013; **369**: 290-2.
